# Supplementary material for: Smart numerical technique for faults diagnosis based on a similarity algorithm experimentally investigated on AC machine stator windings
Source: Research Square preprint supplement (doi:10.21203/rs.3.rs-5061447/v1), 2025-03-31
Supplement: Supplementary file 1 [file 5f44028d5b27b942a2c64c28.pdf]

# **Nomenclatures:**

| Symbols                                           | Abbreviations                                                                                                                        | Symbols    | Abbreviations                                                                                                                                                                                                           |
|---------------------------------------------------|--------------------------------------------------------------------------------------------------------------------------------------|------------|-------------------------------------------------------------------------------------------------------------------------------------------------------------------------------------------------------------------------|
| $3LNF$                                            | Three Line-to-Neutral Fault                                                                                                          | $Ki_{2c}$  | The disturbance indicator derived using the cross-correlation estimator ( $ri_{2c}$ )                                                                                                                                   |
| $CT$                                              | Current Transformer                                                                                                                  | $K_s$      | The selected setting of the time multiplier                                                                                                                                                                             |
| $CTR$                                             | Current Transformer Ratio                                                                                                            | $MCSA$     | Motor current signature analysis                                                                                                                                                                                        |
| $CB$                                              | Circuit Breaker                                                                                                                      | $N_c$      | The number of observations per one cycle for each current wave,                                                                                                                                                         |
| $CMV$                                             | Common-Mode Voltage                                                                                                                  | $N_s$      | The number of observations per the data set size ( $N_s \leq N_c$ ) of the current wave,                                                                                                                                |
| $DAC$                                             | Data Acquisition Card                                                                                                                | $PMSMs$    | Permanent magnet synchronous motors                                                                                                                                                                                     |
| $DLF$                                             | Double Line Fault                                                                                                                    | $PWM$      | Pulse Width Modulation                                                                                                                                                                                                  |
| $DLNF$                                            | Double Line-to-Neutral Fault                                                                                                         | $ri_{12a}$ | The strength of the cross-correlation estimator quantified between each two corresponding data sets for the two currents ( $i_{1a}(n)$ and $i_{2a}(n)$ ) taken for 'A' phase of the AC machine stator windings,         |
| $FFT$                                             | Fast Fourier Transform                                                                                                               | $ri_{12b}$ | The strength of the cross-correlation estimator quantified between each two corresponding data sets for the two currents ( $i_{1b}(n)$ and $i_{2b}(n)$ ) taken for 'B' phase of the AC machine stator windings,         |
| $i_{1a}(n)$ ,<br>$i_{1b}(n)$ and<br>$i_{1c}(n)$ : | The values of the three-phase currents at instant 'n' measured at the three-phase supply end of the AC machine stator windings.      | $ri_{12c}$ | The strength of the cross-correlation estimator quantified between each two corresponding data sets for the two currents ( $i_{1c}(n)$ and $i_{2c}(n)$ ) taken for 'C' phase of the AC machine stator windings,         |
| $i_{2a}(n)$ ,<br>$i_{2b}(n)$ and<br>$i_{2c}(n)$ : | The quantities of the three-phase currents at instant 'n' measured at the three-phase neutral end of the AC machine stator windings. | $ri_{1a}$  | The strength of the auto-correlation estimator quantified between each two consecutive data sets that are shifted from each other by one cycle for the electrical current $i_{1a}(n)$ acquired at the supply side end,  |
| $i_{1a}(n-N_c)$                                   | The observation of the electrical current ( $i_{1a}$ ) at the instant ( $n-N_c$ ),                                                   | $ri_{2a}$  | The strength of the auto-correlation estimator quantified between each two consecutive data sets that are shifted from each other by one cycle for the electrical current $i_{2a}(n)$ acquired at the neutral side end, |
| $i_{2a}(n-N_c)$                                   | The observation of the electrical current ( $i_{2a}$ ) at the instant ( $n-N_c$ ),                                                   | $ri_{1b}$  | The strength of the auto-correlation estimator quantified between each two consecutive data sets that are shifted from each other by one cycle for the electrical current $i_{1b}(n)$ acquired at the supply side end,  |
| $i_{1b}(n-N_c)$                                   | The observation of the electrical current ( $i_{1b}$ ) at the instant ( $n-N_c$ ),                                                   | $ri_{2b}$  | The strength of the auto-correlation estimator quantified between each two consecutive data sets that are shifted from each other by one cycle for the electrical current $i_{2b}(n)$ acquired at the neutral side end, |
| $i_{2b}(n-N_c)$                                   | The observation of the electrical current ( $i_{2b}$ ) at the instant ( $n-N_c$ ),                                                   | $ri_{1c}$  | The strength of the auto-correlation estimator quantified between each two consecutive data sets that are shifted from each other by one cycle for the electrical current $i_{1c}(n)$ acquired at the supply side end,  |
| $i_{1c}(n-N_c)$                                   | The observation of the electrical current                                                                                            | $ri_{2c}$  | The strength of the auto-correlation estimator quantified between each two consecutive data sets that are shifted from                                                                                                  |

|                 |                                                                                                                                                                                                                                           |                                           |                                                                                                                                                                                                                                          |
|-----------------|-------------------------------------------------------------------------------------------------------------------------------------------------------------------------------------------------------------------------------------------|-------------------------------------------|------------------------------------------------------------------------------------------------------------------------------------------------------------------------------------------------------------------------------------------|
|                 | $(i_{1c})$ at the instant $(n-N_c)$ ,                                                                                                                                                                                                     |                                           | each other by one cycle for the electrical current $i_{2c}(n)$ acquired at the neutral side end,                                                                                                                                         |
| $i_{2c}(n-N_c)$ | The observation of the electrical current $(i_{2c})$ at the instant $(n-N_c)$ ,                                                                                                                                                           | $r_{auto}$                                | The auto-correlation coefficient computed for each phase current                                                                                                                                                                         |
| $IM$            | Induction motor,                                                                                                                                                                                                                          | $r_{pu}$                                  | The predetermined correlation pickup of the relay (it is $r_{pu} = 1.0 - \Delta s_2$ or $r_{pu} = 1.0 - \Delta s_3$ ),                                                                                                                   |
| $Ki_{12a}$      | The disturbance indicator derived using the cross-correlation estimator $(ri_{12a})$                                                                                                                                                      | $SLNF$                                    | Single-Line-to-Neutral Fault                                                                                                                                                                                                             |
| $Ki_{12b}$      | The disturbance indicator derived using the cross-correlation estimator $(ri_{12b})$                                                                                                                                                      | $TTTFs$                                   | Turn-to-Turn Faults                                                                                                                                                                                                                      |
| $Ki_{12c}$      | The disturbance indicator derived using the cross-correlation estimator $(ri_{12c})$                                                                                                                                                      | $T_i$                                     | The estimated tripping time of the relay (in Sec)                                                                                                                                                                                        |
| $Ki_{1a}$       | The disturbance indicator derived using the cross-correlation estimator $(ri_{1a})$                                                                                                                                                       | $Ti_{1a}$                                 | The estimated tripping time (in Sec) of the relay based on the auto-correlation coefficient, $ri_{1a}$                                                                                                                                   |
| $Ki_{1b}$       | The disturbance indicator derived using the cross-correlation estimator $(ri_{1b})$                                                                                                                                                       | $Ti_{2a}$                                 | The estimated tripping time (in Sec) of the relay based on the auto-correlation coefficient, $ri_{2a}$                                                                                                                                   |
| $Ki_{1c}$       | The disturbance indicator derived using the cross-correlation estimator $(ri_{1c})$                                                                                                                                                       | $Ti_{12a}$                                | The estimated tripping time (in Sec) of the relay based on the cross-correlation coefficient, $ri_{12a}$                                                                                                                                 |
| $Ki_{2a}$       | The disturbance indicator derived using the cross-correlation estimator $(ri_{2a})$                                                                                                                                                       | $\Delta s_1, \Delta s_2$ and $\Delta s_3$ | the numerical values of the correlation deviations,                                                                                                                                                                                      |
| $Ki_{2b}$       | The disturbance indicator derived using the cross-correlation estimator $(ri_{2b})$                                                                                                                                                       | $DRPMSM$                                  | Dual-Redundancy Permanent Magnet Synchronous Motor,                                                                                                                                                                                      |
| $T_{startup}$   | The AC machine startup time                                                                                                                                                                                                               | $I_{startup}$                             | The AC machine startup current,                                                                                                                                                                                                          |
| $T_{backup}$    | The tripping time of the main protection for the next protection zone (in the case of external fault).                                                                                                                                    | $ri_{1xy}$                                | The cross-correlation estimator quantified between each two corresponding data sets for the two currents $(i_{1x}(n))$ and $i_{1y}(n)$ taken at the supply end for the two different phases ‘X and Y’ of the AC machine stator windings, |
| $ri_{2xy}$      | The cross-correlation estimator quantified between each two corresponding data sets for the two currents $(i_{2x}(n))$ and $i_{2y}(n)$ taken at the neutral end for the two different phases ‘X and Y’ of the AC machine stator windings, |                                           |                                                                                                                                                                                                                                          |

**Appendix 1:** The specifications of the power model elements

| The specifications of the power system elements | Numerical value          |
|-------------------------------------------------|--------------------------|
| <b><u>Three-phase power supply:</u></b>         |                          |
| Rated line voltage                              | 380 V                    |
| Rated frequency                                 | 50 Hz                    |
| <b><u>Three-phase induction motor:</u></b>      |                          |
| Rated power                                     | 2.9 kW (Star connection) |
| Rated line voltage                              | 400 V                    |
| Nominal frequency                               | 50 Hz                    |
| Rated line current                              | 6.3 A                    |
| Rated speed                                     | 1415 rpm                 |
| No. of taps per each winding                    | 20 Tapes                 |
| No. of turns per each tap                       | 5 Turns                  |
| Turn dimension                                  | 0.8 mm <sup>2</sup>      |
| <b><u>Current transformers (CTs):</u></b>       |                          |
| Current Transformer turns' Ratio (CTR)          | 200/5                    |
| Frequency                                       | 47...50...63 Hz          |
| CT accuracy class                               | 1.0                      |
| Rated burden                                    | 2.5 VA                   |
| CT burden                                       | 1 $\Omega$               |
| <b><u>Voltage Transformers (VTs)</u></b>        |                          |
| Voltage Transformer turns' Ratio (VTR)          | 220 / 6/3                |
| VT accuracy class                               | 0.5                      |
| Nominal frequency                               | 50/60 Hz                 |
| Rated burden                                    | 25 VA                    |
| <b><u>Miniature Circuit Breaker (MCB1)</u></b>  |                          |
| Phase type                                      | Three phase              |
| Rated current                                   | 63 A                     |
| Rated voltage                                   | 400 V                    |

## Appendix 2: Input quantities of the proposed protection algorithm

| Quantity designation                   | Quantity description                                                                                                                            | Value                                 |
|----------------------------------------|-------------------------------------------------------------------------------------------------------------------------------------------------|---------------------------------------|
| $i_{1a}(n), i_{1b}(n)$ and $i_{1c}(n)$ | The current measurements of $a, b$ and $c$ phases, respectively, at the instant $n$ taken at the supply end of the AC machine stator windings,  | They are measured on-line and updated |
| $i_{2a}(n), i_{2b}(n)$ and $i_{2c}(n)$ | The current measurements of $a, b$ and $c$ phases, respectively, at the instant $n$ taken at the neutral end of the AC machine stator windings, |                                       |
| $F_c$                                  | The fundamental cycle frequency for electrical signals                                                                                          | 50 Hz                                 |
| $T_c$                                  | The cycle time interval                                                                                                                         | 20 milliseconds                       |
| $F_{sp}$                               | The frequency rate of the digital system                                                                                                        | 2.5 kHz                               |
| $T_{sp}$                               | The sampling time span                                                                                                                          | 0.4 milliseconds                      |
| $N_c$                                  | The sample size per each one cycle, $N_c = T_c / T_{sp}$ or $N_c = F_{sp} / F_c$                                                                | 50 samples/cycle                      |
| $N_s$                                  | The sample size per each data set area, $N_s = N_c$                                                                                             | 50 samples/data set                   |
| $T_{ds}$                               | The full display time                                                                                                                           | 10 cycles                             |
| $\Delta s_1$                           | The predetermined deviation for the cross-correlation coefficients: ( $ri_{12a}, ri_{12b}$ and $ri_{12c}$ )                                     | +0.05                                 |
| $\Delta s_2$                           | The predetermined deviation for the auto-correlation coefficients: ( $ri_{1a}, ri_{1b}$ and $ri_{1c}$ )                                         | +0.05                                 |
| $\Delta s_3$                           | The predetermined deviation for the auto-correlation coefficients: ( $ri_{2a}, ri_{2b}$ and $ri_{2c}$ )                                         | +0.05                                 |
| $K_s$                                  | The selected setting of the time multiplier used for estimating the tripping time in the case of TTTF,                                          | 0.3                                   |
| $r_{pu}$                               | The predetermined correlation pickup of the relay (it is $r_{pu} = 1.0 - \Delta s_2$ or $r_{pu} = 1.0 - \Delta s_3$ ), and                      | +0.95                                 |
